# Supplementary material for: Electron-donating and -withdrawing groups discriminate the fluorometric sensing of phosgene
Source: Royal Society of Chemistry journal article supplement (doi:10.1039/d4ay00954a), 2024-01-01
Supplement: d4ay00954a1.pdf [file d4ay00954a1.pdf]

## ***Supporting Information***

### **Electron Donating and Withdrawing Effect Discriminate the Fluorometric Sensing of Phosgene**

Anirban Karak<sup>a</sup>, Pintu Ghosh<sup>a</sup>, Shilpita Banerjee<sup>a</sup>, Debasish Mandal<sup>b</sup>, Ajit Kumar Mahapatra<sup>a\*</sup>

<sup>a</sup> *Molecular Sensor and Supramolecular Chemistry Laboratory, Department of Chemistry, Indian Institute of Engineering Science and Technology, Shibpur, Howrah 711 103, India*

<sup>b</sup> *School of Chemistry and Biochemistry, Thapar Institute of Engineering and Technology, Patiala 147004, Punjab, India*

\*Author to whom correspondence should be addressed; electronic mail:

[akmahapatra@chem.iiests.ac.in](mailto:akmahapatra@chem.iiests.ac.in); Tel.: +91 – 9434508013

1. Comparison between previously reported probe and this work
2. Theoretical calculation
3. UV-Vis and fluorescence study of the control compound HMBT
4. Calculation of detection limit
5. NMR Spectroscopy <sup>1</sup>H and <sup>13</sup>C
6. Mass Spectroscopy
7. FT-IR Spectroscopy
8. Calculation of quantum yield
9. References

**Table S1: Comparison between previously reported probe and this work**

| Structure of the probe                                                              | Solvent                           | Mode of sensing | Application | LOD          | Response time | Ref |
|-------------------------------------------------------------------------------------|-----------------------------------|-----------------|-------------|--------------|---------------|-----|
| 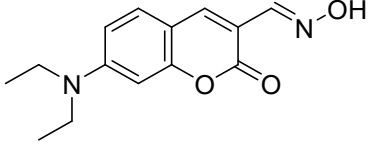   | Acetonitrile-water (1:1)          | ICT             | Paper-Strip | 0.12 $\mu$ M |               | 1   |
|    | CHCl <sub>3</sub> -acetone (1: 1) | PET & ICT       | Paper-Strip | 1.54 nM      | <50 seconds   | 2   |
|   | CH <sub>3</sub> CN                | ESIPT           | Paper-Strip | 0.16 ppm     | 20 s          | 3   |
|  | Water/acetonitrile solution       | AIE             | Paper-Strip | 9.3 nM       | <30 s         | 4   |
|  | CH <sub>3</sub> CN                | PET             | Paper-Strip | 0.40 $\mu$ M | <1 min        | 5   |

|                                                                                   |                                     |           |                             |           |          |           |
|-----------------------------------------------------------------------------------|-------------------------------------|-----------|-----------------------------|-----------|----------|-----------|
| 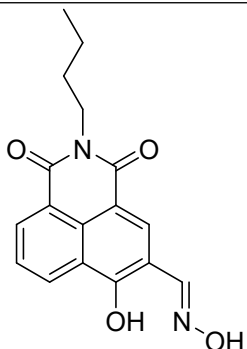 | CH <sub>3</sub> CN                  | ESIPT     | Vapour phase detection, SEM | 0.087 ppm |          | 6         |
|  | CHCl <sub>3</sub>                   |           | Paper-Strip                 | 5.56 nm   | <1.5 min | 7         |
|  | CH <sub>3</sub> CN/H <sub>2</sub> O | ICT & RIR | Paper-Strip                 | 51 nm     | < 20 s   | This Work |

## 2. Theoretical Calculations:

**Table S2:** Selected electronic excitation energies (eV), oscillator strengths (f), main configurations, and CI Coefficients of all the complexes. The data were calculated by TDDFT//M062X/6-31+G(*d,p*) based on the optimized ground state geometries.

| Molecules        | Electronic Transition           | Excitation Energy <sup>a</sup> | f      | Composition <sup>b</sup> | (composition) % |
|------------------|---------------------------------|--------------------------------|--------|--------------------------|-----------------|
| <b>TCAO</b>      | S <sub>0</sub> → S <sub>1</sub> | 4.3991 eV 281.84 nm            | 0.6242 | H → L                    | 88.9            |
| <b>TCAO-phos</b> | S <sub>0</sub> → S <sub>1</sub> | 3.8184 eV 324.70 nm            | 0.5460 | H → L                    | 94.8            |
| <b>HMBT</b>      | S <sub>0</sub> → S <sub>1</sub> | 4.4444 eV 278.97 nm            | 0.4808 | H → L                    | 93.9            |
|                  | S <sub>0</sub> → S <sub>2</sub> | 4.8245 eV 256.99 nm            | 0.4011 | H-1 → L                  | 83.4            |
| <b>HMBT-phos</b> | S <sub>0</sub> → S <sub>1</sub> | 4.5934 eV 269.92 nm            | 0.5896 | H → L                    | 96.6            |
|                  | S <sub>0</sub> → S <sub>2</sub> | 4.9439 eV 250.78 nm            | 0.2779 | H-2 → L                  | 87.9            |

[a] Only selected excited states were considered. The numbers in parentheses are the excitation energy in wavelength. [b] H stands for HOMO and L stands for LUMO.

**Table S3:** Energies of the highest occupied molecular orbital (HOMO) and lowest unoccupied molecular orbital (LUMO)

| Species   | $E_{\text{HOMO}}$ (a.u) | $E_{\text{LUMO}}$ (a.u) | $\Delta E$ (a.u) | $\Delta E$ (eV) | $\Delta E$ (kcal mol <sup>-1</sup> ) |
|-----------|-------------------------|-------------------------|------------------|-----------------|--------------------------------------|
| TCAO      | -0.24354                | -0.01186                | 0.23168          | 6.3043          | 145.4                                |
| TCAO-phos | -0.24434                | -0.03697                | 0.20737          | 5.6428          | 130.1                                |
| HMBT      | -0.29212                | -0.05210                | 0.24002          | 6.5313          | 150.6                                |
| HMBT-phos | -0.30195                | -0.05635                | 0.2456           | 6.6831          | 154.1                                |

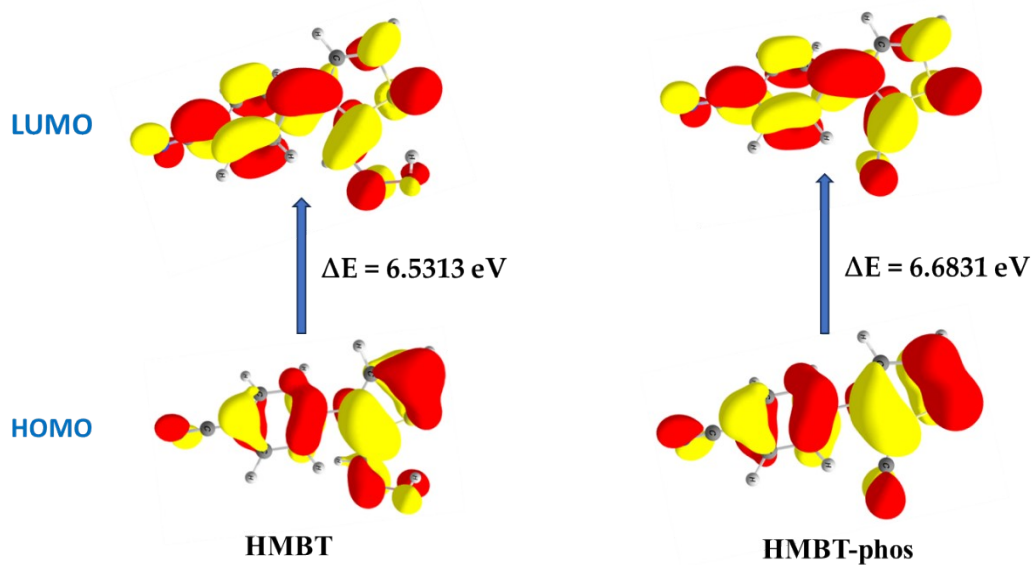

**Figure S2:** Frontier MO diagram with HOMO-LUMO energy gap of HMBT and HMBT-phos.

### 3. UV-Vis and fluorescence study of the control compound HMBT.

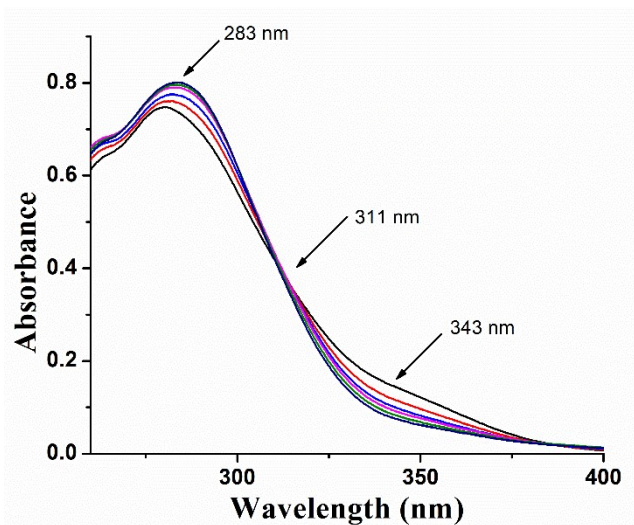

**Figure S3:** UV-Vis absorption spectra of the probe **HMBT** ( $1 \times 10^{-5}$  M) in the solvent  $\text{CH}_3\text{CN} / \text{H}_2\text{O}$  (1:1, v/v).

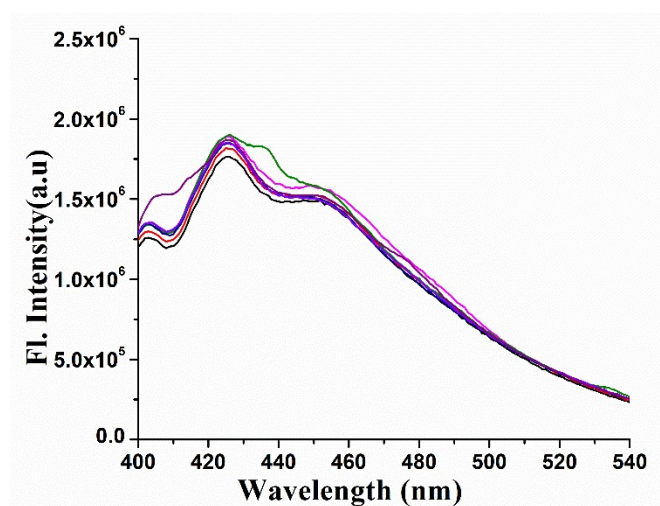

**Figure S4:** Fluorescence spectra of **HMBT** ( $1 \times 10^{-5}$  M) in the solvent  $\text{CH}_3\text{CN} / \text{H}_2\text{O}$  (1:1, v/v) in the presence of phosgene.

#### 4. Calculation of Limit of detection

The limit of detection (LOD) of TCAO for phosgene was calculated utilizing the general equation  $DL = K \times Sb1/S$

Where  $K = 2$  or  $3$  (we take  $2$  in this case) and  $Sb1$ , obtained as  $0.033349$  is the standard deviation of the blank solution and  $S$  is the slope of the calibration curve

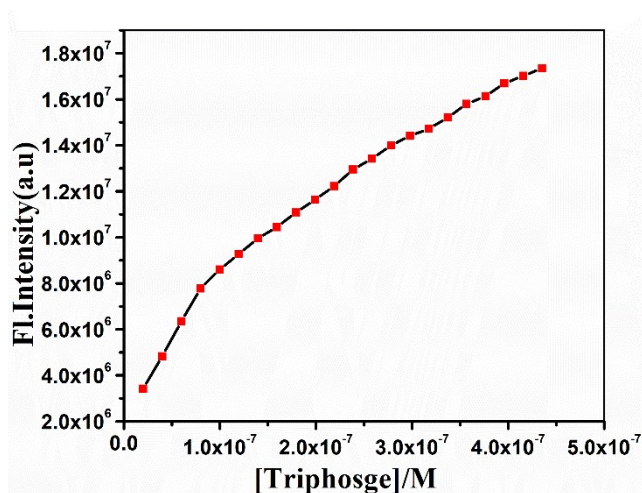

**Figure S5:** Plot of fluorescence intensity vs molar concentration of triphosgene

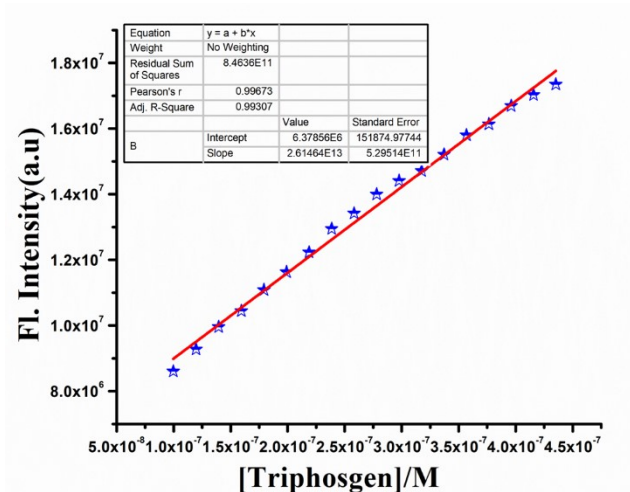

**Figure S6:** Fluorescence linear fit (496 nm) plot in the concentration region 0.1-0.45  $\mu\text{M}$  for estimation of limit of detection.

## 5. NMR Spectra: $^1\text{H}$ NMR, $^{13}\text{C}$ NMR:

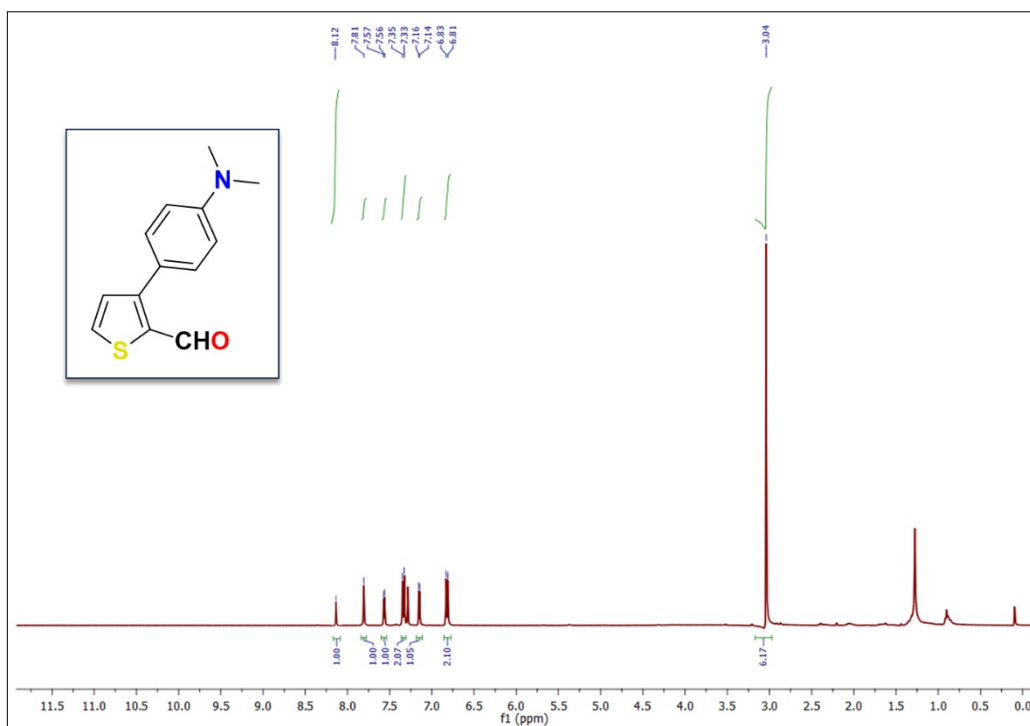

Figure S7:  $^1\text{H}$  NMR of TCA.

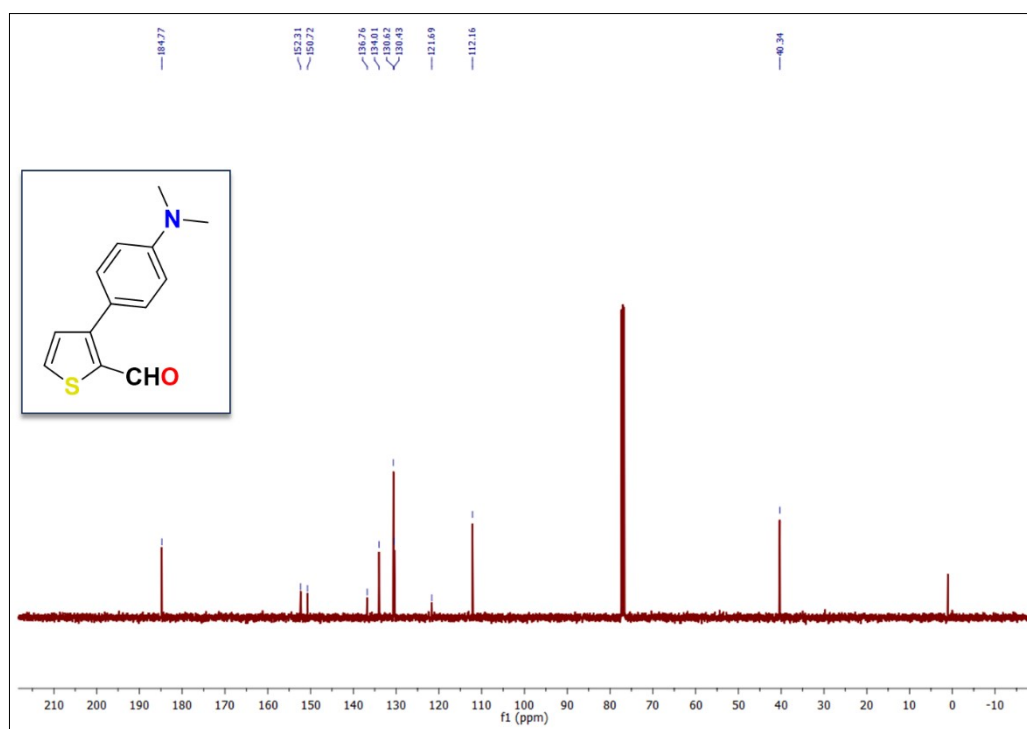

Figure S8:  $^1\text{H}$  NMR of TCA.

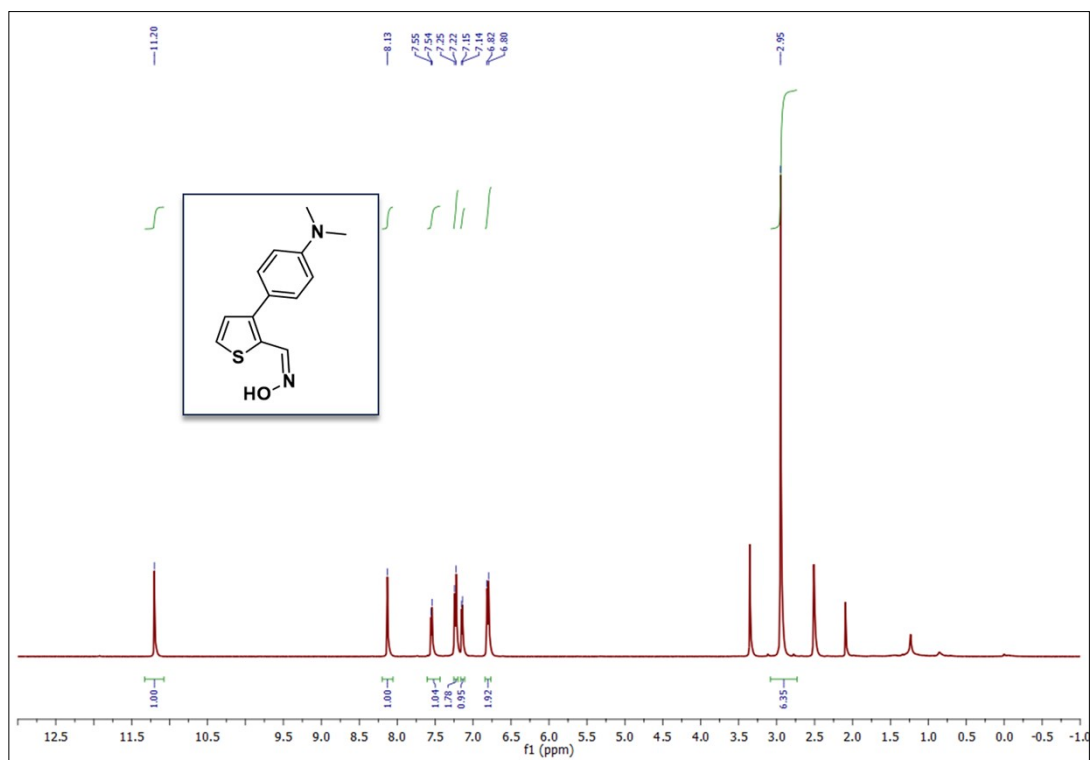

Figure S9:  $^1\text{H}$  NMR of TCAO.

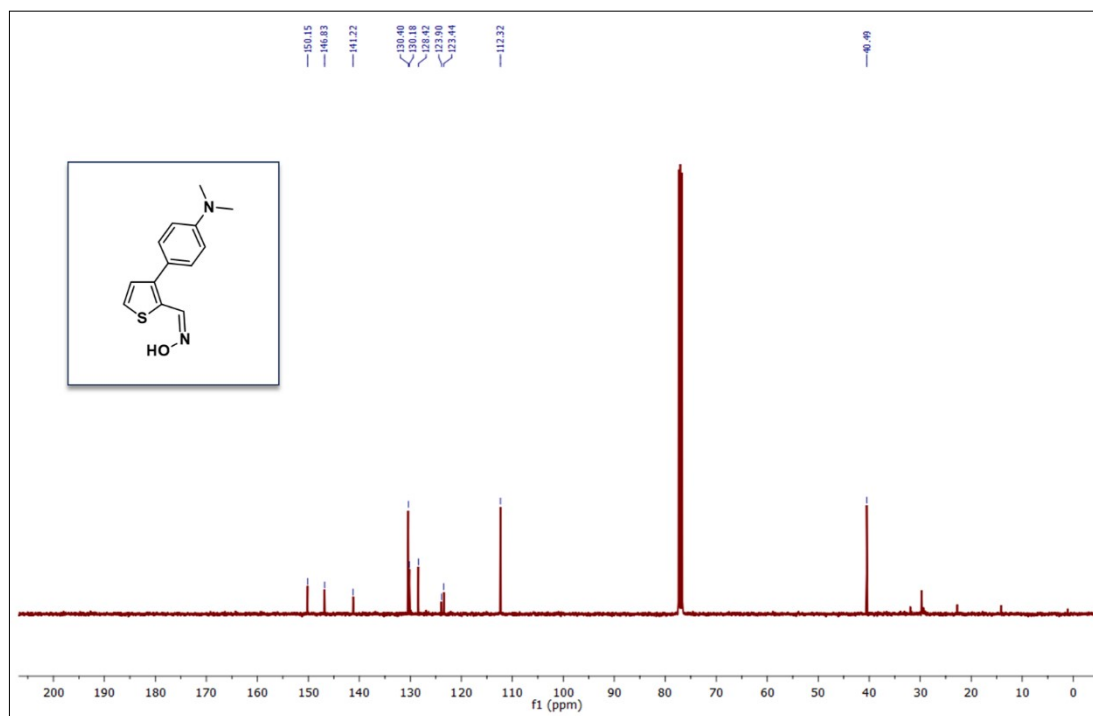

Figure S10:  $^{13}\text{C}$  NMR of TCAO.

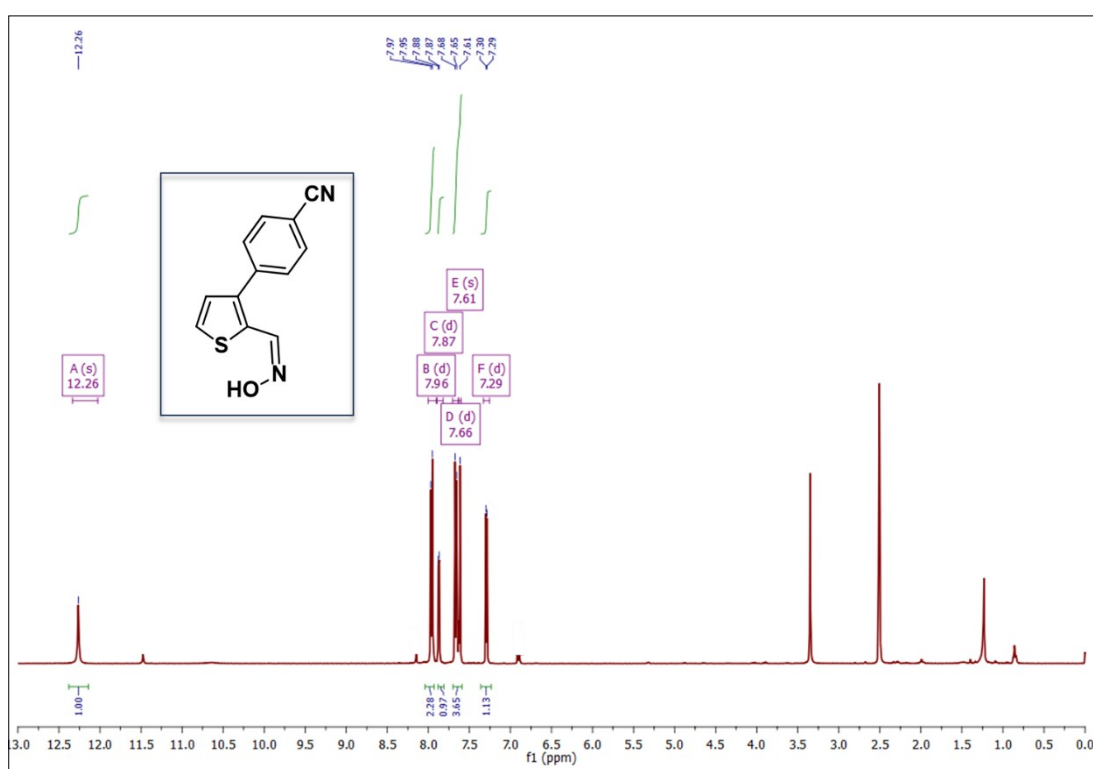



**Figure S11.**  $^1\text{H}$  NMR of the HMBT.

## 6. Mass Spectroscopy:

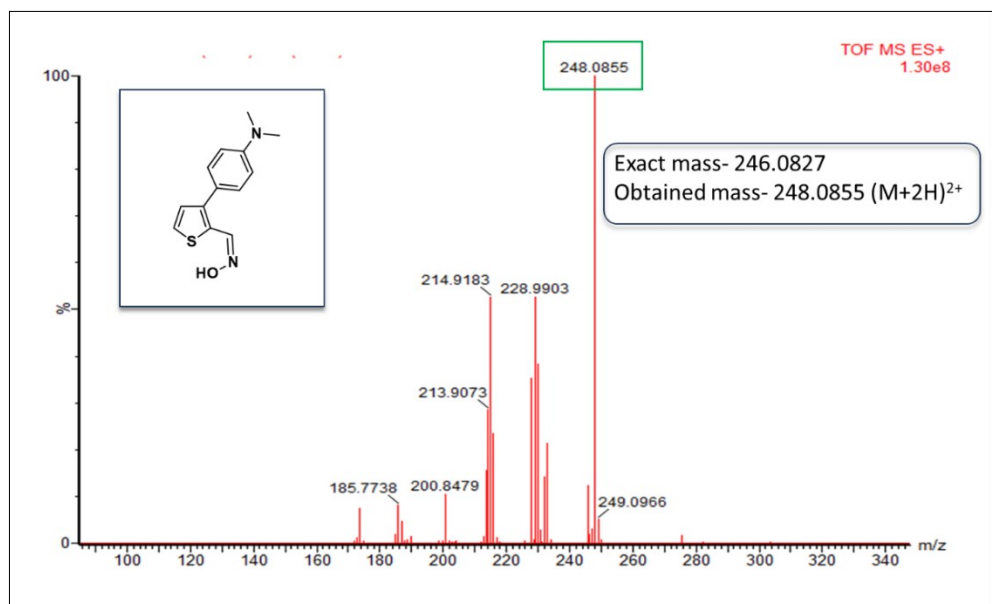

**Figure S12:** HRMS mass spectra of the probe TCAO.

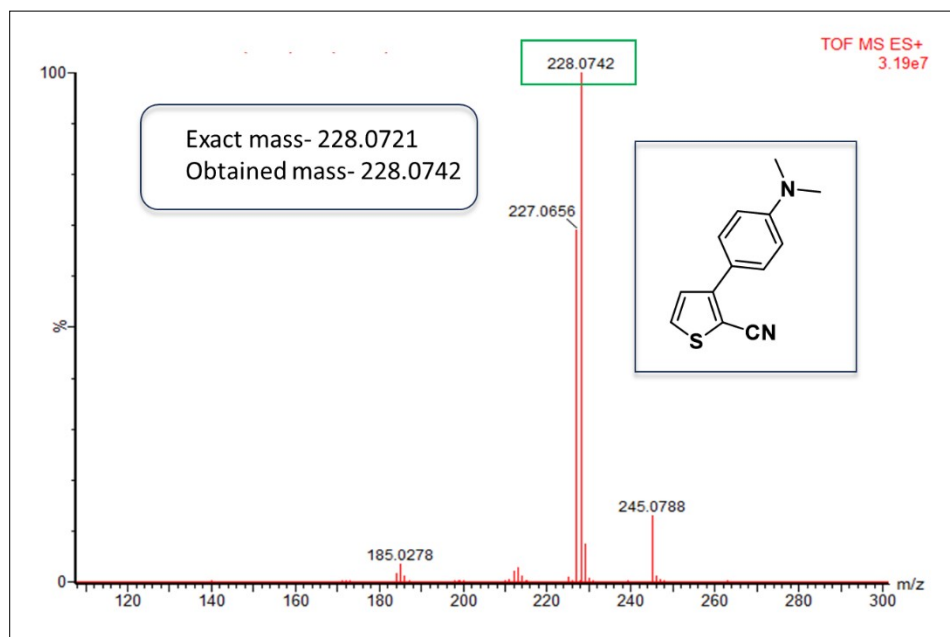

**Figure S13:** HRMS mass spectra of the adduct TCAO-phos.

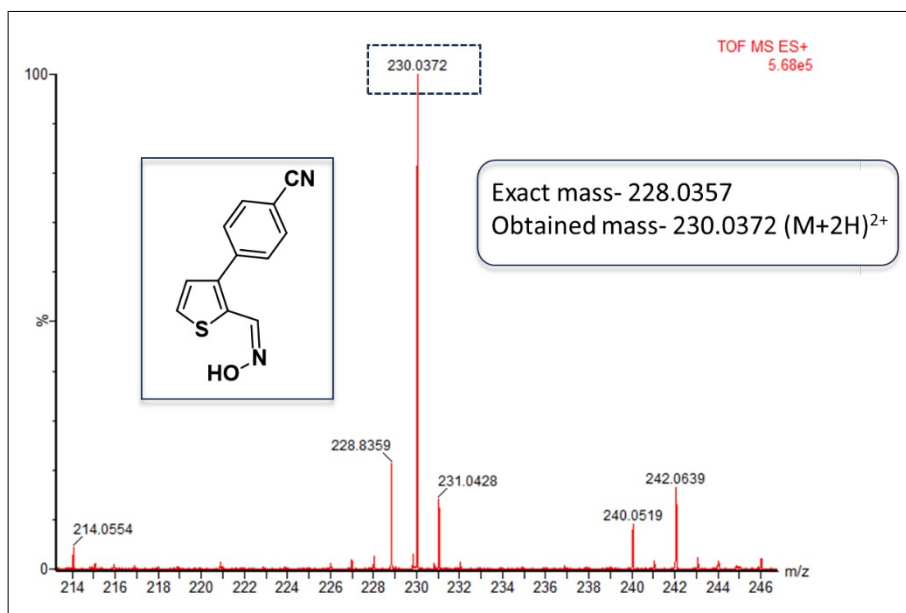

**Figure S14:** HRMS mass spectra of the HMBT.

## 7. FT-IR Spectroscopy:

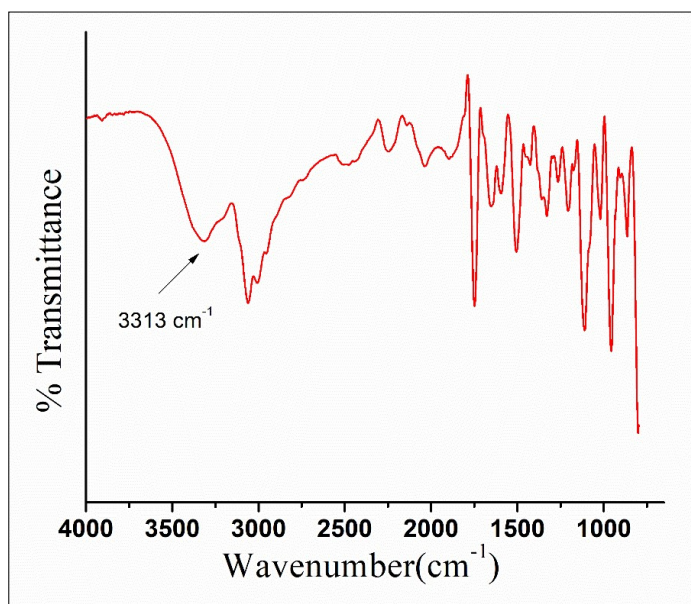

**Figure S15:** FT-IR spectroscopy of TCAO.

### 8. Calculation of quantum yield of TCAO in the absence and presence of phosgene.

Here, the fluorescence quantum yield  $\Phi$  was calculated by using the following equation:

$$\Phi_x = \Phi_s (F_x / F_s) (A_s / A_x) (\eta_x^2 / \eta_s^2)$$

Where, X and S indicate the unknown and standard solution respectively,  $\Phi$  = quantum yield

F = Area under the emission curve, A = Absorbance at the excitation wavelength,

$\eta$  = Refractive index of solvent. Here  $\Phi$  measurements were performed using fluorescein in ethanol as standard [ $\Phi = 0.79$ ]

$\eta_s = 1.36$  (for ethanol);  $\eta_x = 1.34$  (for acetonitrile)

In the absence of phosgene, the calculated quantum yield ( $\Phi_x$ ) for probe TCAO = 0.043.

where,  $\Phi_s = 0.79$ ,  $F_x = 4.71 \times 10^8$ ,  $F_s = 4.34 \times 10^8$ ,  $A_s = 0.008$ ,  $A_x = 0.151$ .

In the presence of phosgene, the calculated quantum yield ( $\Phi_x$ ) for adduct TCAO-phos = 0.155.

Where,  $\Phi_s = 0.79$ ,  $F_x = 1.38 \times 10^9$ ,  $F_s = 2.00 \times 10^9$ ,  $A_s = 0.008$ ,  $A_x = 0.178$ .

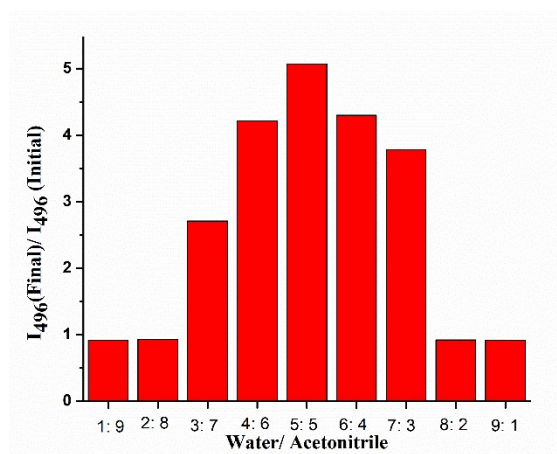

**Figure S16:** Fluorescence intensity ratio of Final to Initial emission at 496 nm with the addition of excess phosgene in the different solvent ratio.

### 8. References

1. S. Paul, P. Ghosh and P. Roy, *New Journal of Chemistry*, 2020, **44**, 5784-5791.
2. A. Gangopadhyay, and A.K. Mahapatra, *New Journal of Chemistry*, 2019, **43**, 14991-14996.
3. F. Zeng, G. Bao, B. Zhou, and Y. Han, *New Journal of Chemistry*, 2021, **45**, 5631-5636.
4. L. Da-Xue, L. Dan, Z. Liang, X. Yan-Hua, S. Shao-Hui, Z. Bo, L. Rui, Z. Hong-Ling, L. Jian, H. Zhi-Ping and J. Zhi-Gang, *Chemical Communications*, 2022, **58**, 5296-5299.
5. A. Gangopadhyay and A.K. Mahapatra, *New Journal of Chemistry*, 2019, **43**, 11743-11748.
6. K. Maiti, D. Ghosh, R. Maiti, V. Vyas, P. Datta, D. Mandal and D.K. Maiti, *Journal of materials chemistry A*, 2019, **7**, 1756-1767.
7. A. Gangopadhyay, S.S. Ali and A.K. Mahapatra, *ChemistrySelect*, 2019, **4**, 8968-8972.
